# Supplementary material for: Analysis of the drivers of ASF introduction into the officially approved pig compartments in South Africa and implications for the revision of biosecurity standards
Source: Springer Nature journal article supplement (doi:10.1186/s40813-022-00286-7), 2022-10-06
Supplement: MOESM1 [file 40813_2022_286_MOESM1_ESM.pdf]

**Additional File 1.** Risk factors relevant to ASF introduction into compartments in South Africa by category

| <b>Category</b>                | <b>No.</b> | <b>Risk factor</b>                                                                                                                                                                 | <b>Proxy</b>                                                                      |
|--------------------------------|------------|------------------------------------------------------------------------------------------------------------------------------------------------------------------------------------|-----------------------------------------------------------------------------------|
| Domestic pigs                  | 1          | High on-farm domestic pig density                                                                                                                                                  | On-farm pig density                                                               |
|                                | 2          | Farms with poor biosecurity (e.g. backyard farm) located outside but in proximity to the compartment (< 5km)                                                                       | Proximity to farms with poor biosecurity                                          |
|                                | 3          | Proximity of the compartment (< 5 km) to a farm that was infected with ASF within the last three months                                                                            | Proximity to ASF-affected farms                                                   |
|                                | 4          | Introduction of new pigs to the compartment without testing for ASF virus or quarantine                                                                                            | Un-tested introductions into the herd                                             |
|                                | 5          | Use of boars from outside the compartment for breeding that are not tested for ASF virus                                                                                           | Use of un-tested breeding boars                                                   |
|                                | 6          | Use of pig semen, ova or embryos from a non-ASF-free certified source(s)                                                                                                           | Use of uncertified genetic material                                               |
|                                | 7          | Entry of free-roaming pigs into the compartment premises due to improper fencing                                                                                                   | Entry of free-roaming pigs                                                        |
|                                | 8          | Direct and indirect contact between pigs within the compartment premises and free-roaming pigs outside the compartment premises due to improper fencing                            | Contact with free-roaming pigs                                                    |
|                                | 9          | Return of live pigs to the compartment following presentation to markets or auctions                                                                                               | Return of live pigs                                                               |
| Human behaviors and activities | 10         | Insufficient boot cleaning & disinfection or boot & clothes changing of external people (e.g. pig traders, middlemen, transporters) upon entering the pig sites in the compartment | Insufficient boot and clothing biosecurity by external people                     |
|                                | 11         | Insufficient boot cleaning & disinfection or boot & clothes changing of livestock field officers/ veterinarians/ para-veterinarians upon entering the pig sites in the compartment | Insufficient boot and clothing biosecurity by animal health personnel             |
|                                | 12         | Insufficient cleaning & disinfection or changing of clothes & boots, facilities and equipment of compartment personnel that are in contact with pigs                               | Insufficient cleaning & disinfection of boots, clothes, facilities, and equipment |
|                                | 13         | Feeding of non-cooked or under cooked swill i.e. commercial or household food waste within the compartment                                                                         | Feeding of food waste                                                             |
|                                | 14         | Underreporting of suspected ASF cases due to various factors e.g. insufficient capacity to recognize ASF clinical signs, lack of an easy reporting system                          | Underreporting of suspect ASF cases                                               |

|                   |    |                                                                                                                                                                                                        |                                                                         |
|-------------------|----|--------------------------------------------------------------------------------------------------------------------------------------------------------------------------------------------------------|-------------------------------------------------------------------------|
|                   | 15 | Euthanasia/ culling of sick pigs within the premises of the compartment without proper disposal of carcasses and offal                                                                                 | Improper carcass disposal of sick pigs                                  |
|                   | 16 | Slaughtering of pigs within the premises of the compartment for human consumption without veterinary supervision or without proper disposal of carcasses and offal                                     | Improper on-site slaughter                                              |
|                   | 17 | Hunting/ culling of wild suids within the compartment premises without proper containment and disposal of carcasses and offal resulting in presence of contaminated materials on the site              | Improper hunting/ culling of wild suids inside the compartment          |
|                   | 18 | Hunting/ culling of wild suids outside but in proximity to the compartment premises (< 5km) without proper disposal of carcasses and offal resulting in presence of contaminated materials on the site | Improper hunting/ culling of wild suids in proximity to the compartment |
|                   | 19 | Compartment personnel taking meals regularly outside areas specifically reserved for dining                                                                                                            | Meals outside designated areas                                          |
| Wild suids        | 20 | Wild suid entry into the compartment premises due to improper fencing                                                                                                                                  | Wild suid entry                                                         |
|                   | 21 | Direct and indirect contact between pigs within the compartment premises and wild suids outside the compartment premises due to improper fencing                                                       | Contact with wild suids                                                 |
| Competent vectors | 22 | Presence of the tick vector (i.e. tsetse flies) in and around (< 5km) the compartment premises without tick control measures                                                                           | Tick vectors                                                            |
|                   | 23 | Presence of biting flies (e.g. Stomoxys calcitrans) in and around (< 5km) the compartment premises without fly control measures                                                                        | Biting flies                                                            |
| Fomites           | 24 | Insufficient decontamination of swine transport vehicles entering & leaving the compartment premises                                                                                                   | Insufficient decontamination of swine transport vehicles                |
|                   | 25 | Insufficient decontamination of non-swine delivery vehicles (e.g. supplier of feed, equipment, health products) entering & leaving the compartment premises                                            | Insufficient decontamination of non-swine delivery vehicles             |
|                   | 26 | Insufficient decontamination of own tractors & lawnmowers entering the compartment premises                                                                                                            | Insufficient decontamination of own tractors & lawnmowers               |
|                   | 27 | Transport of pigs from multiple non-compartment sources in the same vehicle to compartment                                                                                                             | Same-vehicle transport                                                  |
|                   | 28 | The same vehicle of the compartment used to transport pigs from the compartment to the abattoir is also used for internal movement of pigs, feed or raw                                                | Abattoir transport                                                      |

|    |  |                                                                                                                                                               |                                                                           |
|----|--|---------------------------------------------------------------------------------------------------------------------------------------------------------------|---------------------------------------------------------------------------|
|    |  | materials without sufficient decontamination between shipments                                                                                                |                                                                           |
| 29 |  | Use of feed (e.g. fresh grass, seeds, crops) or bedding originating from areas in which wild suids have had access                                            | Contaminated feed or bedding                                              |
| 30 |  | Improper disposal of domestic pig carcasses and manure within the compartment premises                                                                        | Improper disposal of carcasses and manure                                 |
| 31 |  | Insufficient control of scavenger animals (e.g. sacred ibis, feral cats, feral dogs, feral pigs) within the compartment premises                              | Insufficient control of scavenger animals within the compartment          |
| 32 |  | Insufficient control of scavenger animals (e.g. sacred ibis, feral cats, feral dogs, feral pigs) outside but in proximity to (< 5km) the compartment premises | Insufficient control of scavenger animals in proximity to the compartment |
| 33 |  | Insufficient pest (e.g. mice, rats, birds) control within the compartment premises                                                                            | Insufficient pest control                                                 |
| 34 |  | Regular presence of pets (e.g. dogs, cats) within the compartment premises                                                                                    | Regular presence of pets                                                  |
